RESEARCH ARTICLE

# Collaborative application of the food sustainability assessment framework (FOODSAF) to transform food systems and farmer livelihoods in Makueni County, Kenya

Stellah Mikalitsa Mukhovi<sup>1\*</sup>, Chinwe Ifejika Speranza<sup>2</sup>, Boniface Kiteme<sup>3</sup>, Aymara Zonta Llanque<sup>4</sup>

**1** Department of Geography, Population, and Environmental Studies, University of Nairobi, Nairobi, Kenya, **2** Institute of Geography, University of Bern, Switzerland, **3** Centre for Training and integrated research in ASAL Development, Nanyuki, Kenya, **4** Leuphana University, Luneburg, Germany

\* [smmukhovi@uonbi.ac.ke](mailto:smmukhovi@uonbi.ac.ke)

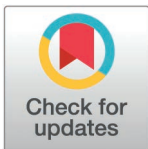

## Abstract

Food systems in arid and semi-arid lands face challenges that hinder them from meeting the food needs of communities and sustaining environmental resources. Using a collaborative approach between multiple societal stakeholders and academic actors, we applied the Food Sustainability Assessment Framework (FOODSAF) and a gender-differentiated participatory process in three workshops in Kenya involving women and men farmers, and social actors from the government, civil society, and private sector. The objectives of the study were to; a) assess the food sustainability of the Makueni agro-pastoral food system, b) assess the extent to which policies and practices of government, private sector, and civil society actors provide for an enabling or dis-enabling environment for farmers to achieve food sustainability, c) evaluate stakeholders perspectives of food sustainability indicators and identify areas in the food system that require intervention. The data were collected using workshops with farmers, policy implementers, private sector, and civil society actors, and analysed using descriptive analysis. The results show disparity in assessment of indicators by different stakeholders reflecting their perspectives, interests, experiences, and knowledge about each food system indicator. The performance of the value chain, the capacity of the food system to process and store food, and social self-organisation received the lowest scores and hence formed the basis for further reflection and collective action. This study shows that collective action supported by empirical evidence and collaborative considerations with stakeholders can contribute to the transformation of food systems and the associated farmer livelihoods. More collective actions are required to solve structural problems that smallholder farmers are incapable of negotiating individually.

## OPEN ACCESS

**Citation:** Mukhovi SM, Ifejika Speranza C, Kiteme B, Llanque AZ (2026) Collaborative application of the food sustainability assessment framework (FOODSAF) to transform food systems and farmer livelihoods in Makueni County, Kenya. PLoS One 21(4): e0342435. <https://doi.org/10.1371/journal.pone.0342435>

**Editor:** Koushik Chowdhury, Vivekananda Global University, INDIA

**Received:** March 21, 2025

**Accepted:** January 22, 2026

**Published:** April 21, 2026

**Copyright:** © 2026 Mukhovi et al. This is an open access article distributed under the terms of the [Creative Commons Attribution License](https://creativecommons.org/licenses/by/4.0/), which permits unrestricted use, distribution, and reproduction in any medium, provided the original author and source are credited.

**Data availability statement:** "Yes - all data are fully available without restriction; All relevant data are within the paper and its [Supporting Information](#) files. Additional data on the project "Towards Food Sustainability: reshaping the

coexistence of different food systems in South America and Africa” can be obtained from University of Bern repository <https://boris-portal.unibe.ch/home>. The project lead: Prof. Stephan Rist. In addition, more data on the project can be obtained from the following article which we co-authored: <https://doi.org/10.1038/s41598-020-76284-y>”.

**Funding:** This research was carried out within the Swiss Programme for Global Issues on Development (r4d programme) funded by the Swiss Agency for Development and Cooperation (SDC) and the Swiss National Science Foundation (SNSF) [Grant number 400540\_152033]. The funders had no role in study design, data collection and analysis, decision to publish, or preparation of the manuscript.

**Competing interests:** The authors have declared that no competing interests exist.

## 1. Introduction

Food systems worldwide face pressures from global environmental change, declining soil fertility, population increase, institutional changes, erratic prices, land degradation, water stress, agrobiodiversity loss, among others [1,2,3]. Agropastoral food systems, especially in sub-Saharan Africa, are among the most vulnerable to climate change impacts including extreme events such as floods and droughts [4,5]. Since the World Food Summit in 1996, many countries are still struggling to eliminate hunger, which has been compounded by the COVID-19 pandemic, escalating food prices, fuel prices, and poverty [6] – an indication of unsustainable food systems. Major efforts in the United Nations Sustainable Development Goals (SDGs) have prioritized hunger and poverty reduction as goals to be achieved by 2030. However, achieving food and nutrition security, and securing incomes and reducing poverty, remain challenging [7,8]. Food systems may also have negative outcomes such as pollution by agrochemicals and the loss of biodiversity [9]. Sustainable production and consumption, structural policy interventions, and safety net programmes have been proposed as ways to achieve food security for the world’s vulnerable people [10,11].

Assessing food systems thus requires examining the input sources, how the food is produced, distributed, processed, retailed, consumed, and finally how wastes are managed [12,13]. In this study, food sustainability is conceptualized as consisting of five dimensions namely the right to food, social-ecological resilience, environmental performance, food security, and reduction of poverty and inequality [14]. A food system approach is a holistic framework that addresses the complex interactions and feedback between stakeholders, activities, and outcomes, and helps to identify intervention points to enhance peoples’ wellbeing [15]. The approach helps in balancing the economic, cultural, technological, political, social, and environmental aspects of food systems with a view of creating a sustainable future [16].

According to [17], the food systems approach enables the comparison of different intervention possibilities and to systematically analyse the synergies and trade-offs between different policy objectives. Considering that food systems vary from place to place and by individual experiences, it is important to adopt participatory instruments to assess food systems. One such instrument is the food sustainability framework that actors can use to identify and prioritize food system interventions. Several studies [18,19] have applied the food sustainability framework as a diagnostic tool to identify interventions with farmers through a participatory process. The FOODSAF was applied due to its strength as a learning and evaluation tool. FOODSAF enables farmers, practitioners and researchers to collaboratively learn about various aspects of a focus food system as well as identify bottlenecks to be addressed to make the food system more sustainable. The FOODSAF is a participatory tool allowing problem solving through multistakeholder discussions and consensus building [20]. In using a food system sustainability framework together with the community in a participatory process, we identify strengths and weaknesses of the focus food system and co-design interventions that can help create a more sustainable food system [21].

Using a systems theory, we apply the framework to the agro-pastoral food system in Kenya and assess the views of multi-stakeholders including policy implementers, private sector actors, smallholders, and civil society actors (S4 Table). We show how consensus was built by multiple stakeholders to arrive at an intervention to enhance food sustainability at the community level. Unlike other studies that looked at a single community, this study presents results of a collective action by three villages who agreed to work together to establish a grain aggregation store in one of the villages for mutual benefit. The intervention also included the establishment of an association to enhance the bargaining power of the members, collaboration, and collective decision making.

The objective of the study were to assess a) the food sustainability of the agro-pastoral food system of Makueni County, Kenya; b) the extent to which policies and practices of government, private sector, and civil society actors provide for an enabling or dis-enabling environment for farmers to achieve food sustainability, and c) to evaluate stakeholders' perspectives of food sustainability indicators and identify areas in the food system that require intervention.

## 2. Materials and methods

### 2.1 The agro-pastoral food system in Makueni County, Kenya

Makueni County is located in the lowlands of Eastern Kenya at 1°48'S 37°37'E with a population of 949,298, comprising 49% males and 51% females (Kenya National Bureau of Statistics [Kenya National Bureau of [22]. It has an area of about 8,008.9 km<sup>2</sup> with rainfall between 300–400 mm (mainly in the lowlands) received in two rainy seasons, while temperature of about 35°C is experienced in the low-lying areas of the county. The livelihoods of most county residents depend on small-scale farming that is dominantly rainfed with maize, green grams, pigeon peas, cowpeas, sorghum, pumpkin, sweet potatoes and fruits; mangoes, pawpaw, and oranges as main crops grown on average land holding of 2–4 acres [19]. The main markets for pigeon peas are USA and India, and locally in main towns, while green grams are sold mainly in East Africa and Southern African countries [23]. The farmers integrate crop production with cattle, goats, and poultry.

The county is characterized by high poverty levels with a multidimensional poverty rate of more than 50% compared to the national absolute poverty level (47%) [24]. Poverty in the county is most severe in the dry areas of Kathonziwani, Mavindini, Kithuki, Kalawa, and Kitise. The high poverty level is as a result of several factors, the main one being low agricultural productivity (mainly due to water scarcity, and poor soils), poor access to markets, high unemployment rates, and climate change vulnerability [25,26].

### 2.2 Methods

**2.2.1 The food system sustainability assessment framework.** FOODSAF is an assessment framework developed in the frame of a transdisciplinary multi-case study research project over a six-year period (2015–2021) to assess the extent to which food systems meet the five dimensions of food sustainability; the right to food, social-ecological resilience, reduction of poverty and inequality, food security, and environmental performance [27]. For each dimension of FOODSAF, we selected 3 indicators that gave us a total of 15 indicators (Table 1). The framework enabled us to use a participatory process with stakeholders to identify the strength and weaknesses of the food system and to identify possible interventions. The framework was developed by various academic and non-academic actors within 'the towards food sustainability project' funded by the Swiss National Science Foundation and initially implemented in Kenya and Bolivia and later extended to Zambia, Ghana, Brazil and Colombia [28]. It promotes co-creation of knowledge together with stakeholders, connects science to transformative processes and has potential to influence policy that contributes to sustainable food systems.

**2.2.2 Applying the FOODSAF in participatory workshops.** FOODSAF was conducted in three participatory workshops in 2019 to identify potential interventions using a multi-stakeholder approach while the implementation phase was completed in 2022. To address the first objective, a participatory workshop with farmers was used to assess from

**Table 1. Summary of FOODSAF assessment by different stakeholders.**

| FOODSAF Dimensions and Indicators                                    | Scoring by government officers | Scoring by private sector and civil society actors | Scoring by women farmers | Scoring by men farmers |
|----------------------------------------------------------------------|--------------------------------|----------------------------------------------------|--------------------------|------------------------|
| Food security                                                        | 3                              | 3.6                                                | 3                        | 2                      |
| Household food security                                              | 3                              | 4                                                  | 3                        | 3                      |
| Power relations (regarding food in household and in the food system) | 3                              | 3                                                  | 3                        | 2                      |
| Capacity of the food system to store and process food                | 3                              | 4                                                  | 3                        | 1                      |
| Right to food                                                        | 4                              | 3.3                                                | 4.3                      | 2.6                    |
| Non-discrimination                                                   | 4                              | 3                                                  | 4                        | 2                      |
| Access to information                                                | 4                              | 4                                                  | 5                        | 4                      |
| Effective participation                                              | 4                              | 3                                                  | 4                        | 2                      |
| Poverty and inequality                                               | 2.7                            | 3                                                  | 2.6                      | 1.7                    |
| Sources and levels of incomes                                        | 2                              | 2.3                                                | 3                        | 2                      |
| Access to socio- technological infrastructure                        | 3                              | 3                                                  | 3                        | 2                      |
| Performance of food value chains                                     | 3                              | 4                                                  | 2                        | 1                      |
| Environmental performance                                            | 4                              | 3.7                                                | 3.7                      | 2.7                    |
| Environmental benefits of the food system landscape                  | 4                              | 4                                                  | 3                        | 2                      |
| Carbon footprintsequestration (Trees in the food system)             | 4                              | 4                                                  | 4                        | 4                      |
| Impact on human health                                               | 4                              | 3                                                  | 4                        | 2.3                    |
| Social-Ecological Resilience                                         | 3.3                            | 3                                                  | 3.7                      | 2.3                    |
| Diversity                                                            | 4                              | 3                                                  | 3                        | 3                      |
| Social self- organisation                                            | 4                              | 4                                                  | 2                        | 4                      |
| Ancestral knowledge (Indigenous and Local Knowledge)                 | 2                              | 2                                                  | 4                        | 2                      |

<https://doi.org/10.1371/journal.pone.0342435.t001>

their perspectives, the sustainability of their agro-pastoral food system using the FOODSAF indicators (S1 Fig). The 19 farmers comprising 10 women and 9 men, were drawn from three villages: Kwakavisi, Mbuvo, and Mavindini located in the three wards Kathozweni, Kitehe/ Kithuki, and Mavindini respectively. Using purposive sampling, we selected the most active members from farmer groups through the help of county extension personnel. To capture gender perspectives, the farmers were divided into men and women farmers' focus group discussion. The facilitators comprised researchers and practitioners engaged in the multi-case study research project and extension personnel from Makueni county who were involved in the entire process of the transformative pilot project to ensure the sustainability of the intervention. The different dimensions of the FOODSAF were explained and discussed with all farmers in one session using drawings (Fig 2) prior to the assessments using the local Kikamba language (two of the facilitators spoke the local Kikamba language). After ensuring the farmers understood the dimensions, a Likert scale of 1–5 (1-very bad to 5- excellent) (Fig 1) was used by the groups to score each indicator. Each group was accompanied by two researchers/facilitators that recorded the discussions leading to the scores assigned to each dimension and the associated explanations. After the assessments, we compared and discussed the scores of men and women farmers thereby highlighting areas of divergence and convergence and discussing options for transformative actions to improve the food sustainability of the agro-pastoral food system. The FOODSAF assessment guide was used throughout the process while the discussions were captured using a tape recorder as well as notes.

We conducted another similar participatory workshop with practitioners from Government (6), private sector (5), and civil society (5) using the same scoring criteria to address the second objective, also using the FOODSAF (S2 Fig). The

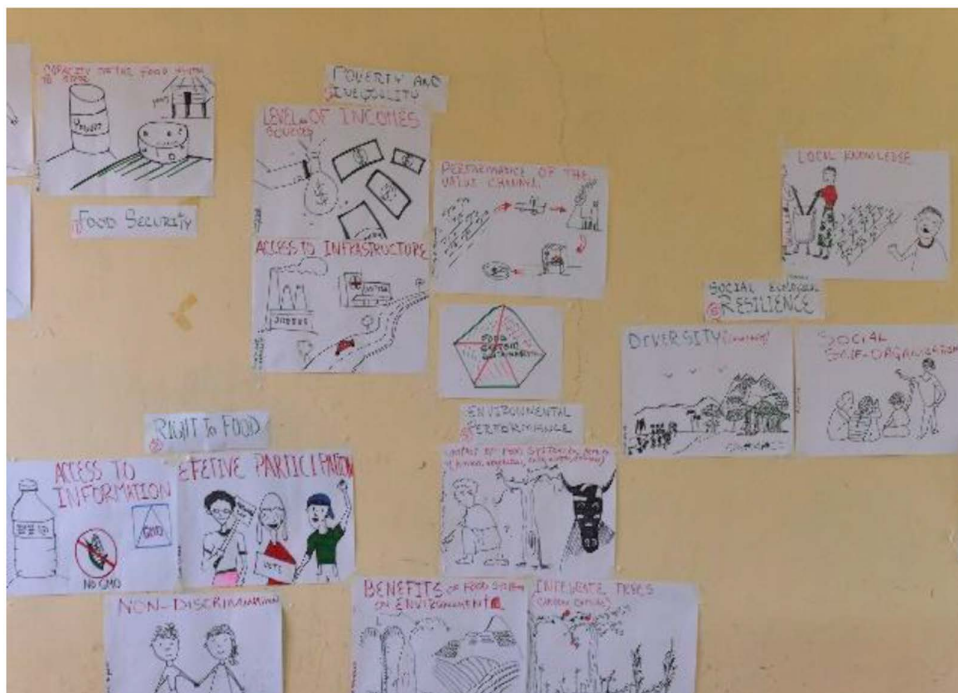

**Fig 1. Drawings showing some FOODSAF indicators and scoring criteria.**

<https://doi.org/10.1371/journal.pone.0342435.g001>

practitioners were representatives of organisations that were actively engaged in agriculture and food security in the county. We adopted a multi-level and polycentric governance perspective that includes policies and activities (practices) at the county and national levels, as well as considering the influences of both government and non-government actors on the food system. We divided the participants into 2 groups, one for government actors (Extension officers in the county) and the other for both the private sector and civil society actors (e.g., Purchasers for industry, international NGOs such as World Vision). We asked the group of government officers comprising mainly, extension officers, to assess to what extent government policies and practices (activities) provide for an enabling or dis-enabling environment for farmers to achieve food sustainability. We posed the same question to the group comprising private sector and civil society practitioners to assess the contributions of their sector to food sustainability in the county. We then not only compared the scores given by the two groups of practitioners, but also those scored in the previous workshop with men and women farmers. In the third workshop, the discussions were aimed at building consensus by all actors on the best collective action to address the challenges identified by stakeholders (S3 Table). We again discussed the convergence and divergence in the scores of the four groups and identified potential transformative actions to improve the sustainability of the agro-pastoral food system and follow-up actions.

### 3. Results

#### 3.1 Smallholders perspectives on food sustainability

The results show that both men and women agreed on access to information, household food security, carbon footprint/sequestration, source and levels of income, diversity, and household food security (Table 1). According to women farmers, social self-organisation was good (4) while men farmers rated it as bad (2) (S3 Table). The rest of the actors agreed with women's assessment on social self-organisation as being good (4). The high score by women farmers on social

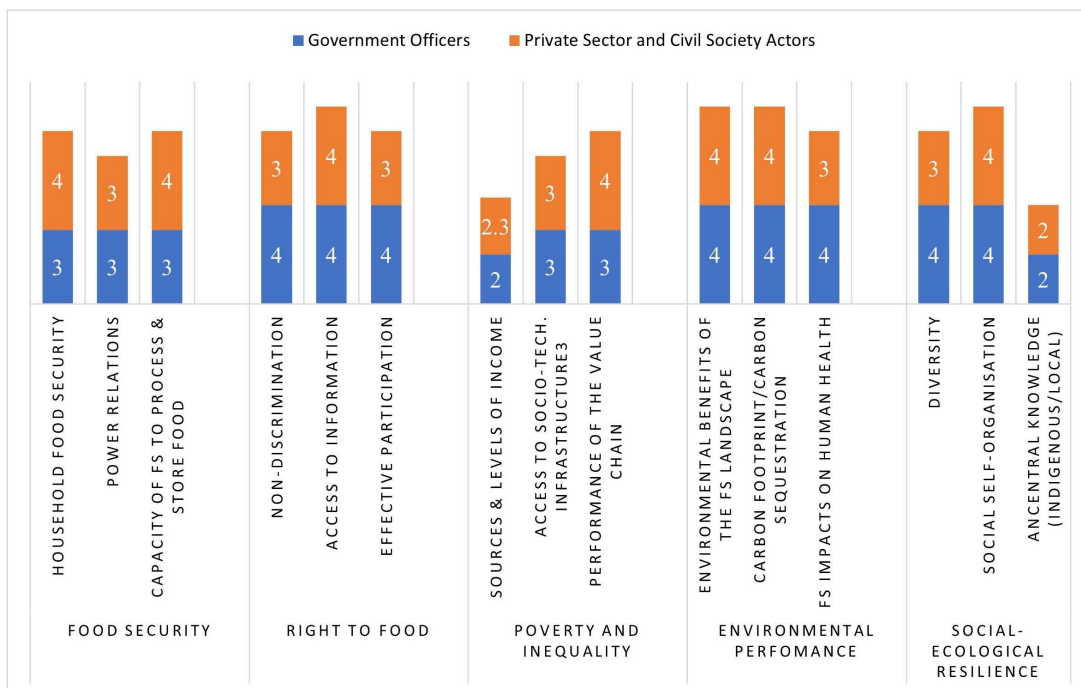

**Fig 2. Assessment of indicators by government officers, and private sector and civil society.**

<https://doi.org/10.1371/journal.pone.0342435.g002>

self-organisation could be linked to their role in Self- Help Groups (SHG) locally known as *chamas* which are often dominated by women. Women also scored some indicators high compared to men, such as the capacity of the food system to store and process food (men 1, women 3).

Regarding overall average assessment of the indicators by farmers, the highest score was on the right to food by women (4.3 very good) and the lowest was on poverty and inequality as scored by men (1.7 bad). There was agreement about the average assessment scores for men and women on environmental performance where the scores were 3 (women) and 3.3 (men). The farmers gave reasons such as high adoption of agroforestry, implementation of soil and water conservation measures, conservation agriculture, and use of organic fertilizers.

The indicators that were rated highly by extension personnel were diversity (4), self-organisation (4), integration of trees into agricultural landscapes (4), environmental benefits of the food system (4), and impacts of food systems on health (4) (Table 1 and Fig 2). The lowest scores were: use of indigenous and local knowledge (2), and sources and levels of income (2). Regarding mean scores, the highest was the right to food (4), meaning that access to information, effective participation, and non-discrimination were all rated highly. On the contrary, poverty and inequality received the lowest mean score of 2.7 an indication that the food system actors, activities, and processes did not help to reduce poverty and inequality.

The civil society actors agreed with the extension personnel on local knowledge but not on diversity, they also disagreed on food system impact on health where extension personnel gave a high score of 3 while civil society gave a low score of 2. Additionally, “sources and levels of income” was given a high score by extension officers but a low score by civil society (Fig 3). The highest mean score for civil society was 3 for all the five indicators (Table 1 and Fig 4).

### 3.2. Assessment of FOODSAF indicators and identification of areas for improvement

**3.2.1 Food security.** The highest possible score of 4 (good) was by the private sector and civil society on household food security and capacity of the food system to process and store food (Fig 3). The private sector actors argued that the

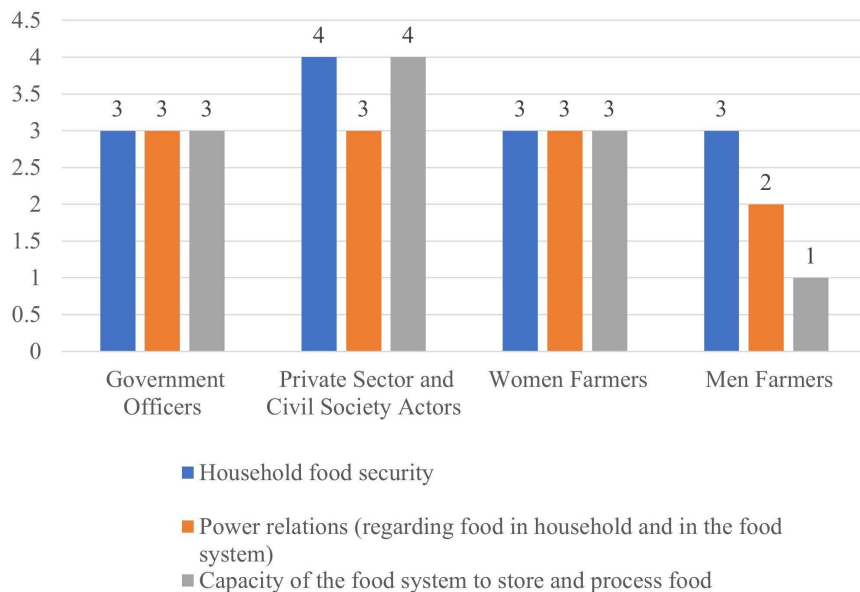

**Fig 3. Stakeholder perspectives on food security.**

<https://doi.org/10.1371/journal.pone.0342435.g003>

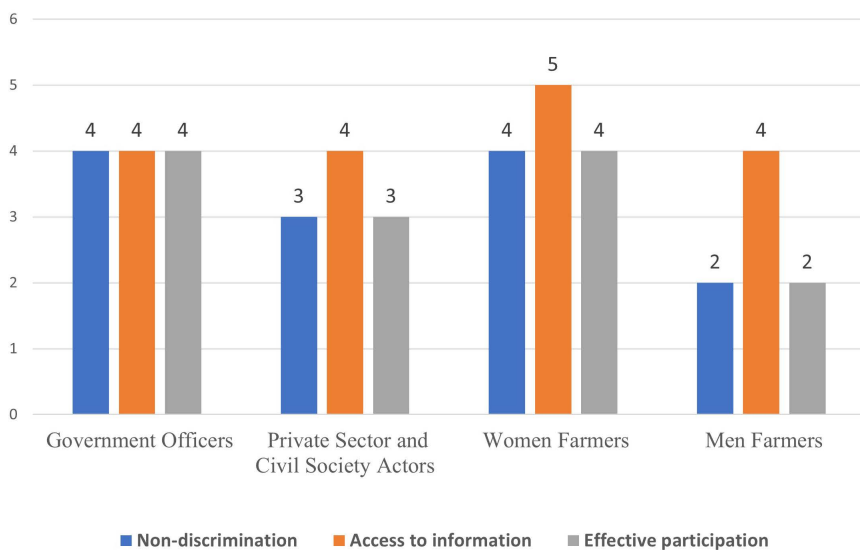

**Fig 4. Stakeholder perspectives on the right to food.**

<https://doi.org/10.1371/journal.pone.0342435.g004>

households have a diversity of foods, and that they use traditional methods to process food. Women are more involved in food processing and storage than men [29,30], hence their view may reflect a better understanding regarding this indicator. The government officers and women farmers agreed on all indicators while men farmers gave the lowest score of (1) to the capacity of the food system to process and store food.

**3.2.2 Right to food.** Government officers and women farmers gave high scores for all indicators (effective participation, non-discrimination and access to information) while the men farmers gave a low score of 2 (bad) for non-discrimination, and effective participation (Fig 4).

Women gave the highest score of 5 (excellent) for access to information which contradicts previous studies that have shown that access to government extension services in the county is poor [31], however, there are possibility of alternative sources of information/extension service that farmers access. Article 43 (1) (c) of the Constitution of Kenya, 2010, on the Social and Economic Rights states that ‘every person has a right to be free from hunger, and to have adequate food of acceptable quality’ thus providing for a human right-based approach to food security in Kenya. This is in line with international standards emanating from the 1966 International Covenant on Economic Social and Cultural Rights (ICESCR) Article 11.2 that recognizes the fundamental right of everyone to be free from hunger and identifies corresponding state obligations [32,33].

Nine years after the promulgation of the Kenyan constitution, evidence from the grassroots show that efforts exist on the ground to achieve the right to food. This is related to high scores given by the government officers who perhaps have a better perspective of the concept and efforts to achieve it. Obligation to fulfil the right to food places a duty on governments to facilitate access to and to provide food to the vulnerable people in the society. The farmers also mentioned receiving relief food during severe droughts and that those who were 65 years and above and vulnerable, were enrolled on the government cash transfer program [34,35].

**3.2.3. Environmental performance.** Environmental performance received high scores from almost all the actors except men who rated environmental benefits of food system landscapes and impacts of the food systems on health as bad (Fig 5).

The reasons given were limited knowledge of agrochemicals and their excessive use that is likely to affect the health of farmers. On the other hand, government officers, civil society actors, and women rated all the indicators as either fair or good. They gave various reasons: integration of crops with trees, control of soil erosion by terracing, integrating agrochemicals with organic farming among others. These arguments support studies in Makueni County that show success in the implementation of Soil and Water Conservation (SWC) measures practiced for several decades [36]. Most farmers practice contour ridging, agroforestry, and other in situ rainwater conservation by trapping water and preventing runoff. Farmers in Makueni and Machakos practice diverse SWC technologies on their farms. The most popular practices are

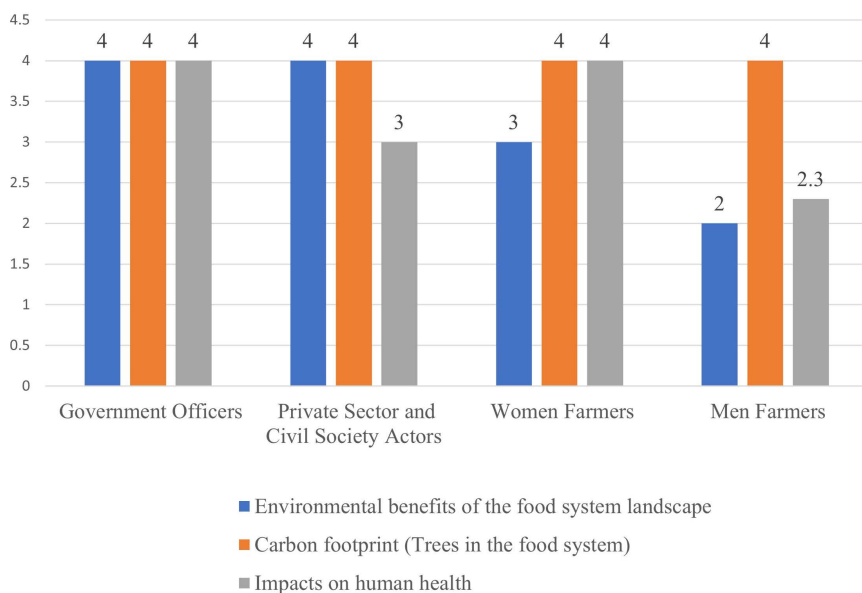

**Fig 5. Stakeholder perspectives on environmental performance.**

<https://doi.org/10.1371/journal.pone.0342435.g005>

cut-off drains, retention ditches, terracing, run-off harvesting, and agroforestry. Additionally, Makueni farmers have also embraced Conservation Agriculture (CA) [37].

**3.2.4 Poverty and inequality.** "Sources and levels of income was scored low (2) by many actors except for women farmers who scored it as fair (3). On the other hand, civil society actors gave a high score of good (4) for performance of the value chain while other actors- women and men farmers and government actors gave a score of 3 and below (Fig 6). During the discussions, performance of the value chain was perhaps the most contentious issue since the farmers complained about intermediaries (also referred to locally as middlemen or brokers) exploiting them with low prices. This was attributable to poor post-harvest management that compelled farmers to dispose of their farm produce immediately at low prices. Indeed, studies have shown that smallholder farmers' resilience is affected by poor producer prices due to many factors including exploitation by middlemen [38]. Poor infrastructure could also contribute to low prices, leading to overall low scores of poverty and inequality. The farmers also argued that roads are available but in poor condition during the rainy seasons, constraining their access to markets.

**3.2.4 Social-ecological resilience.** The highest score of 4 (good) was diversity (government officers), social-self organisation (civil society and women), and use of ancestral knowledge (indigenous and local knowledge (women) (Fig 7). Apart from women farmers, all the other actors gave a score of 2 (bad) for use of ancestral knowledge. The reasons by women for high scores on indigenous knowledge were that they eat traditional foods, some still use traditional utensils-calabashes and gourds, use traditional production practices, and indigenous and local knowledge in post-harvest management combined with strategies such as agroforestry. Social self-organisation was rated bad (2) by women farmers, but good (4) by private and civil society actors, government officials, and men (S4 Table). On the other hand, the high score by government officers (4- good) could be an indication of the reality as SHGs are registered by the State Department for Gender and Affirmative Action

### 3.3 Synthesis of the views from multi stakeholders' and prioritization of food system interventions

The purpose of conducting the participatory food sustainability assessment was to identify the weak areas in the food system and to prioritize them for intervention purposes. The dimensions that received the lowest mean scores were poverty

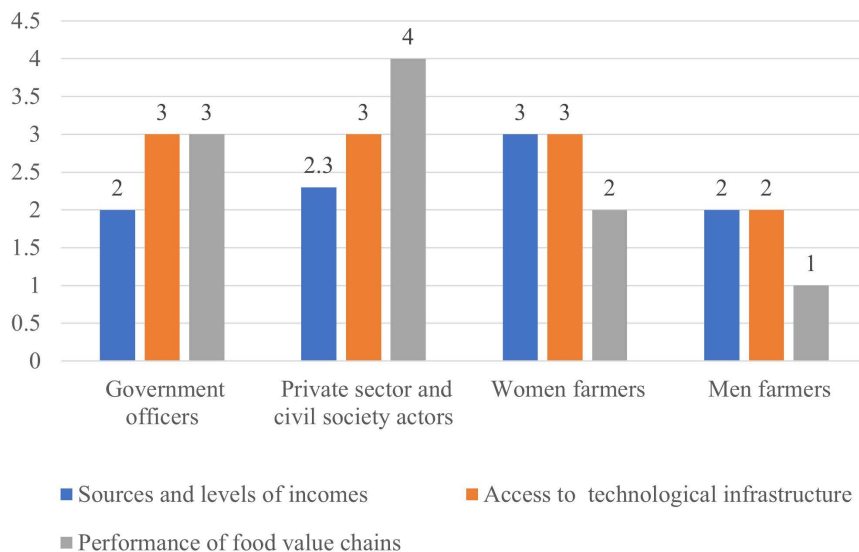

**Fig 6. Perspectives on poverty and inequality in the food system by government officers, private and civil society actors.**

<https://doi.org/10.1371/journal.pone.0342435.g006>

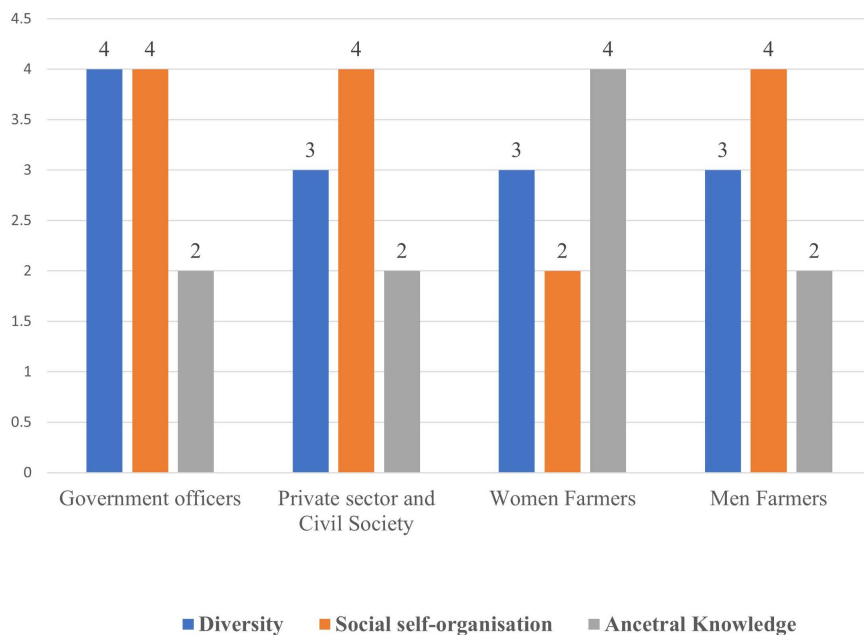

**Fig 7. Stakeholders perspectives on social-ecological resilience.**

<https://doi.org/10.1371/journal.pone.0342435.g007>

and inequality, followed by food security (Fig 8). The highest scores were right to food, and environmental performance of the food system (Table 2). It therefore, meant that possible areas of interventions were to target the dimension of poverty and inequality, and food security (Table 2). Under food security, the most critical area that participants identified was the *low capacity of the food system to process and store food*, while under poverty and inequality, it was *poor performance of the value chains*.

The consensus building workshop embarked on negotiations, consultations, and benchmarking on interventions together with stakeholders in the county. This was geared towards identifying best interventions that could reduce post-harvest losses, ensure smooth marketing of farm grains, and improve income for farmers. After lengthy negotiations, the stakeholders agreed to come up with two interventions to simultaneously address the two challenges: poor performance of the value chain, and the low capacity of the food system to process and store food. The challenge of poor performance of the value chain and low capacity of the food system to process and store food was addressed by one solution – the construction of a grain aggregation store to support direct marketing of grains instead of passing through intermediaries (Table 2).

The grain aggregation store served several purposes: a) reduced post-harvest losses-associated with pests and aflatoxin, b) enabled farmers to sell in bulk, c) improved farmers' bargaining power, d) enhanced members' livelihoods by ensuring better income for farm produce, e) transformed post-harvest management for grain in the three villages, f) improved prices for grains, g) improved seed security because the farmers stored their seeds, and i) improved income due to reduction of losses, selling direct to the market, reduced sale of grain for short term needs, and associated benefits for livelihood security. Additionally, grain bulking and storage for commercial purposes had potential to attract young and older men who have traditionally perceived the role of post-harvest management as a woman's activity. In order to sustain the collective action, the officials of the CBO created by the collective action were charged with the responsibility of operating the store, but also other activities such as funds mobilization for the CBO, savings and loans association for members, table banking, environmental stewardship activities, and income generating activities for members. The CBO worked closely with an extension officer from the county who was involved in the collective action right from the initiation stage.

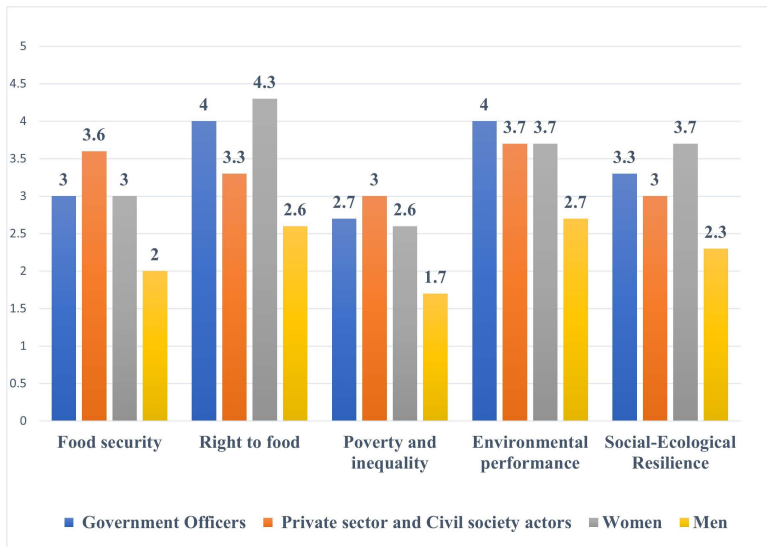

**Fig 8. Summary of assessment by all stakeholders.**

<https://doi.org/10.1371/journal.pone.0342435.g008>

**Table 2. Prioritization of interventions by stakeholders (Higher mean food sustainability score means less need for intervention; Rank: 5 means need for intervention, 1 means less need for intervention).**

| Dimension                    | Mean food sustainability score | Rank | Specific area of Intervention areas               | Interventions                                                                                                                                                    |
|------------------------------|--------------------------------|------|---------------------------------------------------|------------------------------------------------------------------------------------------------------------------------------------------------------------------|
| Right to food                | 3.5                            | 1    | No intervention                                   | No intervention                                                                                                                                                  |
| Environmental performance    | 3.3                            | 2    | No intervention                                   | No intervention                                                                                                                                                  |
| Social-ecological resilience | 2.9                            | 3    | Social-self- organisation                         | Due to low social self-organisation, the farmers agreed to form a Community Based Organisation CBO called MAKWAMBU whose officials would oversee the grain store |
| Food Security                | 2.8                            | 4    | Capacity of food system to process and store food | Creation of a grain aggregation store for bulking and selling directly to the market addressed the two challenges                                                |
| Poverty and inequality       | 2.5                            | 5    | Performance of the value chain                    | Creation of a grain aggregation store enabled farmers to sell in bulk directly to the market                                                                     |

<https://doi.org/10.1371/journal.pone.0342435.t002>

Even though the scores for social-self organisation were high (4) for all actors except men (2), the mean score for social-ecological resilience was 2.9 compared to lowest score of 2.5 for poverty and inequality. Participants agreed through consensus to form a community organisation to oversee the running of the store after project closure. In this regard, a Community Based Organization (CBO) bearing the names of the three villages **Mavindini**, **Kwa kavisi** and **Mbuvo** was formed (MAKWAMBU) and registered with the State Department for Gender and Affirmative Action. The role of the CBO was to enable the farmers from the three villages to collectively address the challenges facing them, oversee the running of the grain store, marketing of the grain, and to spearhead the vision of the CBO.

#### 4. Discussion

This analysis illustrated the systemic character of food. From production to consumption, food involves various actors with different interests and strategies that determine whether a food system achieves its goals. Such goals include being environmentally sustainable, social-ecologically resilient, supporting livelihoods, food and nutrition outcomes, and the

reduction of poverty and inequality [39]. Thus, processes in one dimension of a food system can have system-wide effects on the whole food system but depends also on the interactions with other food system components. In this study, the policy of the right to food in Kenya did not automatically translate to positive food system outcomes, although it might serve as a criteria or benchmark to assess food system interventions [40]. The elaborations by workshop participants also show the role of history in current food systems as colonial legacies may have positive or negative effects on current food systems [41,42].

Comparing the perspectives of men and women reveals how their roles in the household influence their perspectives about the food system. For instance, women play a critical role in food production, processing, marketing, and household provisioning [43] hence their perceptions on some of the indicators such as access to information, diversity and food security reflected their experience in these roles. Women's high scores on access to information could result from; a) their role as farm managers because their husbands mostly migrate out of the village to look for job opportunities, b) their membership in Common Interest Groups that are targeted by extension officers who use a group approach in offering services, c) and besides the formal extension services, women use informal information sources such as other farmers, NGOs, and the private sector [44,45]. On the other hand, men's lowest score on capacity of the food system to process and store food and performance of the value chain could be related to their decision-making roles at the household level [46,47]. As much as women were involved in the actual production, men made the decisions on the types of crops to be planted, the acreage, and after harvest, how much produce was to be stored and sold. Men were hence familiar with prices of agricultural commodities and market prices. Income from the farms was critical in meeting household needs such as healthcare, and children's education [48].

The high scores for the environmental performance were as a result of decades of campaigns by both government and NGOs to restore degraded lands in the larger eastern region of Kenya through soil and water conservation measures. Such measures included agroforestry, terraces, grass strips, soil bunds, and conservation agriculture among others [49]. Makueni is vulnerable to drought-induced food insecurity while other risks such as climate change and variability have been identified to affect smallholder farmers livelihoods and land resources [50]. Efforts to address severe land degradation in several counties in the lower eastern part of Kenya begun in 1990s [51]. NGOs operating in the study region often focus on promoting sustainable land management. Success in soil conservation as observed by the farmers and other stakeholders is attributable to historical factors -programmes on soil conservation and soil erosion control introduced by the colonialists and later institutionalised by the second president of Kenya [52].

Poor performance of the value chain was due to various factors: low value addition, control of markets by brokers (middlemen), low levels of commercialization, low productivity, fragmented markets, low investment in postharvest technologies, poor infrastructure, and vulnerability to climate change [53], [Muia et al., 2024]. Addressing the above challenges can improve the value chain performance leading to multiple benefits for the households. Poor performance of the value chain, among other factors, contributes to low income and food insecurity of the producers. Other factors include a) an insecure land tenure system, poverty, low levels of commercialization, inadequate policies, and limited investment in irrigation [54,55,56].

The right to food received highest scores by all stakeholders, showing involvement of the state and non-state actors' in guaranteeing the right to food for the most vulnerable people in society. Several vulnerable families received cash transfers from government. These included old people above 65 and vulnerable, people living with disability, and orphan headed households. Persons enrolled in the cash transfer program received Ksh. 2000 per month (15.3USD) [57]. Government interventions such as cash transfers and other safety net programmes helped to meet the household needs of vulnerable persons in society and build resilience against shocks. However, the sustainability and governance of such interventions have been questioned [58,59,60]. In addition, due to the high vulnerability to severe droughts in the region, families also received relief food during droughts, among other household and community adaptation measures [61,62]. It is important to note that this research was affected by COVID-19 pandemic, and the vulnerable households in Kenya and

other Countries in Sub-Saharan African were supported by cash transfer that was made possible through donor funding [63,64]. Local collective action also has potential to transform the food systems with better outcomes for food security and livelihood resilience [65].

While FOODSAF has been co-created through transdisciplinary research involving both academic and non-academic actors, it has some limitations: It a) assumes that the academic and non-academic actors involved have profound previous knowledge of the food system being assessed; b) requires that the indicators are domesticated to the context being assessed; c) requires more time for the actors to comprehend the framework before the assessment of the food system, and d) in cases, where no prior research and deep knowledge of the food system exists, it may require a joint fieldwork of academic and non-academic actors to first understand the food system before assessing it. Despite these limitations, FOODSAF has been applied in different contexts and food systems to diagnose challenges and prioritize interventions in six countries (three in Africa, and three in South America) [66].

The outcome of 15 projects arrived at through participatory processes by stakeholders is an indication of its strength. The strength of the framework is also in its participatory nature allowing multi-stakeholders from grassroots to policy level to collaboratively determine development pathways for a community. In addition, the framework focuses on consensus building which is critical for the ownership and sustainability of collective action. A participatory process has several strengths: it a) enables decisions to be taken promptly, b) incorporates diverse perspectives, c) enhances ownership of the collective action, d) enables learning among stakeholders, and e) it helps to build trust among community members and between a community and researchers [67]. However, a participatory process is time consuming, resource intensive, and may be dominated by certain groups [68,69].

## 5. Conclusion

This study applied the FOODSAF tool to the agro-pastoral food system of Makueni county to assess the performance of the food system in five dimensions (right to food, social-ecological resilience, reduction of poverty and inequality, food security, and environmental performance) and to identify levers to enhance the sustainability of the food system. The study confirms that stakeholder perspectives are important in understanding the challenges facing food systems and designing lasting solutions through collective actions. Using the FOODSAF in two gender-differentiated and two sectorial-stakeholder workshops and bringing all stakeholders (participants) together in a consensus workshop to identify and initiate intervention priorities to improve the food system, shows the importance of FOODSAF as an effective diagnostic instrument. Three major concerns that needed urgent solutions were identified, poor performance of the value chain, low capacity of the food system to process and store food, and low levels of social self-organisation. While there are many ways of addressing value chain bottlenecks, all the stakeholders supported the establishment of a grain aggregation store to enhance the farmers' food system. The FOODSAF can thus be applied to other food systems with the relevant contextual adjustments. Further research steps could entail evaluating the effectiveness of the initiatives identified through the FOODSAF to further advance learning about the sustainability of food systems.

## Supporting information

### **S1 Fig. Indicators used in food system assessment.**

(PDF)

### **S2 Fig. Participatory scoring of indicators by different actors.**

(PDF)

### **S3 Table. Justification of the scores by women farmers.**

(PDF)

**S4 Table. Actors in Makueni agropastoral food system.**

(PDF)

**Acknowledgments**

We are grateful to the farmers and other stakeholders in Makueni for allowing us to learn and create together. This paper is dedicated to John Mwangi, an upcoming scientist and community champion, who unfortunately departed from our midst towards the tail end of completing the manuscript.

**Author contributions**

**Conceptualization:** Stellah Mikalitsa Mukhovi, Chinwe Ifejika Speranza, Boniface Kiteme, Aymara Zonta Llanque.

**Data curation:** Aymara Zonta Llanque.

**Formal analysis:** Stellah Mikalitsa Mukhovi, Aymara Zonta Llanque.

**Investigation:** Stellah Mikalitsa Mukhovi, Chinwe Ifejika Speranza, Aymara Zonta Llanque.

**Methodology:** Chinwe Ifejika Speranza, Boniface Kiteme, Aymara Zonta Llanque.

**Resources:** Chinwe Ifejika Speranza.

**Supervision:** Stellah Mikalitsa Mukhovi.

**Validation:** Chinwe Ifejika Speranza, Boniface Kiteme.

**Visualization:** Aymara Zonta Llanque.

**Writing – original draft:** Stellah Mikalitsa Mukhovi.

**Writing – review & editing:** Chinwe Ifejika Speranza, Boniface Kiteme, Aymara Zonta Llanque.

**References**

1. Wijerathna-Yapa A, Pathirana R. Sustainable Agro-Food Systems for Addressing Climate Change and Food Security. *Agriculture*. 2022;12(10):1554. <https://doi.org/10.3390/agriculture12101554>
2. Forster PM, Smith CJ, Walsh T, Lamb WF, Lamboll R, Hauser M, et al. Indicators of Global Climate Change 2022: Annual Update of Large-Scale Indicators of the State of the Climate System and Human Influence. *Earth System Science Data*. 2023;15(6):2295–327. <https://doi.org/10.5194/essd-15-2295-2023>
3. Yang Y, Yang L, Gao H. A novel assessment framework for analyzing the sustainability of water-energy-food nexus system from a pressure-support perspective. *Energy Conversion and Management*. 2025;332:119715. <https://doi.org/10.1016/j.enconman.2025.119715>
4. Gebru AB, Gebreyohannes T, Kahsay GH. Modelling climate change and aridity for climate impact studies in semi-arid regions: The case of Giba basin, northern Ethiopia. *Heliyon*. 2025;11(1):e41693. <https://doi.org/10.1016/j.heliyon.2025.e41693> PMID: 39866426
5. Nidumolu U, Gobbett D, Hayman P, Howden M, Dixon J, Vrieling A. Climate change shifts agropastoral-pastoral margins in Africa putting food security and livelihoods at risk. *Environ Res Lett*. 2022;17(9):095003. <https://doi.org/10.1088/1748-9326/ac87c1>
6. Otekinrin OA. Assessing the Prevalence and Severity of Global Hunger and Food Insecurity: Recent Dynamics and Sub-Saharan Africa's Burden. *Sustainability*. 2024;16(12):4877. <https://doi.org/10.3390/su16124877>
7. Kolloju N, Junuguru S, Kumar KP, Naveen S. Rising food insecurity and the unsdg 2030 agenda: Challenges and innovations in achieving zero hunger. *Climate change, food security, and land management: Strategies for a sustainable future*. Cham: Springer Nature Switzerland. 2025. 1–17.
8. Benton TG, Bieg C, Harwatt H, Pudasaini R, Wellesley L. Food system impacts on biodiversity loss. Three levers for food system transformation in support of nature. London: Chatham House. 2021.
9. Pérez-Escamilla R, Gubert MB, Rogers B, Hromi-Fiedler A. Food security measurement and governance: Assessment of the usefulness of diverse food insecurity indicators for policy makers. *Global Food Security*. 2017;14:96–104. <https://doi.org/10.1016/j.gfs.2017.06.003>
10. Khan Y, Daraz U, Bojnec Š. Enhancing Food Security and Nutrition through Social Safety Nets: A Pathway to Sustainable Development. *Sustainability*. 2023;15(19):14347. <https://doi.org/10.3390/su151914347>
11. Roy A, Moradkhani H, Mekonnen M, Moftakhari H, Magliocca N. Towards strategic interventions for global food security in 2050. *Sci Total Environ*. 2024;954:176811. <https://doi.org/10.1016/j.scitotenv.2024.176811> PMID: 39393686

12. Stefanovic L, Freytag-Leyer B, Kahl J. Food System Outcomes: An Overview and the Contribution to Food Systems Transformation. *Front Sustain Food Syst.* 2020;4. <https://doi.org/10.3389/fsufs.2020.546167>
13. Ambikapathi R, Schneider KR, Davis B, Herrero M, Winters P, Fanzo JC. Global food systems transitions have enabled affordable diets but had less favourable outcomes for nutrition, environmental health, inclusion and equity. *Nat Food.* 2022;3(9):764–79. <https://doi.org/10.1038/s43016-022-00588-7> PMID: 37118149
14. Rist S, Delgado Burgoa F, Mukhovi S, Giger M, Llanque A, Bürgi Bonanomi E, et al. Manual for Participatory Food System Sustainability Assessments and Transformation (FoodSAT)—Steps towards Food Democracy. 2021. <https://ssrn.com/abstract=5242528>
15. Weber H, Poeggel K, Eakin H, Fischer D, Lang DJ, Wehrden HV, et al. What are the ingredients for food systems change towards sustainability?—Insights from the literature. *Environ Res Lett.* 2020;15(11):113001. <https://doi.org/10.1088/1748-9326/ab99fd>
16. Sabio RP, Lehoux P, Rastoin JL. Characterizing food systems to better understand their.
17. Brouwer ID, McDermott J, Ruben R. Food systems everywhere: Improving relevance in practice. *Global Food Security.* 2020;26:100398. <https://doi.org/10.1016/j.gfs.2020.100398>
18. Llanque A, Jacobi J, Tribaldos T, Mukhovi SM, Silvestre C, Tecchio A, et al. Transformations towards food sustainability using the participatory food sustainability assessment framework (FoodSAF). *Social Innovations Journal.* 2021;5(64):695.
19. Mukhovi SM, Kiteme B, Mwangi J, Wambugu G. Transdisciplinary knowledge co-production as a catalyst for community-led innovation: a case study of farmers' milk cooperative in Laikipia, Kenya. *Front Sustain Food Syst.* 2024;8. <https://doi.org/10.3389/fsufs.2024.1494692>
20. van den Akker A, Fabbri A, Slater S, Gilmore AB, Knai C, Rutter H. Mapping actor networks in global multi-stakeholder initiatives for food system transformation. *Food Sec.* 2024;16(5):1223–34. <https://doi.org/10.1007/s12571-024-01476-7>
21. Herens MC, Pittore KH, Oosterveer PJM. Transforming food systems: Multi-stakeholder platforms driven by consumer concerns and public demands. *Global Food Security.* 2022;32:100592. <https://doi.org/10.1016/j.gfs.2021.100592>
22. Kenya National Bureau of Statistics KNBS. Kenya Population and Housing Census 2019.
23. Manickavasagan A, Thirunathan P. Pulses: processing and product development. Springer Nature. 2020.
24. Amwata DA, Nyariki DM, Musimba NRK. Factors Influencing Pastoral and Agropastoral Household Vulnerability to Food Insecurity in the Drylands of Kenya: A Case Study of Kajiado and Makueni Counties. *J of Intl Development.* 2015;28(5):771–87. <https://doi.org/10.1002/jid.3123>
25. Muia VK, Opere AO, Amwata DA. Livelihood vulnerability to climate change in Makueni County, Kenya. *Scientific African.* 2025;27:e02530. <https://doi.org/10.1016/j.sciaf.2025.e02530>
26. Vulnerabilities: a case study in Québec and São Paulo. *Renewable Agriculture and Food Systems.* 2023;38:e25.
27. Rist S, Delgado Burgoa F, Mukhovi S, Giger M, Llanque A, Bürgi Bonanomi P, et al. Manual for participatory food system sustainability assessments and transformation (FoodSAT)—steps towards food democracy. Bern, Switzerland: Centre for Development and Environment (CDE), University of Bern. 2021. Available from: <https://doi.org/10.48350/159940>
28. Rist S, Golay C, Bonanomi EB, Burgoa FM, Kiteme BP, Haller T, et al. Towards food sustainability: reshaping the coexistence of different food systems in South America and Africa—project description. Bern, Switzerland: Centre for Development and Environment (CDE), University of Bern; 2016.
29. Sayas-Barberá E, Pérez-Álvarez JA, Navarro-Rodríguez de Vera C, Fernández-López M, Viuda-Martos M, Fernández-López J. Sustainability and Gender Perspective in Food Innovation: Foods and Food Processing Coproducts as Source of Macro- and Micro-Nutrients for Woman-Fortified Foods. *Foods.* 2022;11(22):3661. <https://doi.org/10.3390/foods11223661> PMID: 36429253
30. Ndhlovu E. Women, Agricultural Development, and Prospects for Industrialisation in Africa. In *Agriculture, Autonomous Development, and Prospects for Industrialization in Africa 2025 Mar 7*. Cham: Springer Nature Switzerland; 2025. 283–300.
31. Kingiri NA. Agricultural advisory and extension service approaches and inclusion in reaching out to Kenyan rural farmers. *African Journal of Science, Technology, Innovation and Development.* 2020;13(7):797–806. <https://doi.org/10.1080/20421338.2020.1823098>
32. Kimani-Murage E, Gitagia M, Osogo D, Mutoro A, Paganini N. A human rights-based approach to food security in Kenya and South Africa. Berlin: TMG Research. 2023.
33. Chiawo DO, Ngila PM, Mugo JW, Wachira MM, Njuki LM, Munu V, et al. Human rights-based approach to community development: insights from a public–private development model in Kenya. *World.* 2025;6(3):104.
34. Haushofer J, Shapiro J. The long-term impact of unconditional cash transfers: experimental evidence from Kenya. 10. Nairobi, Kenya: Busara Center for Behavioral Economics. 2018.
35. He X, Estes L, Konar M, Tian D, Anghileri D, Baylis K, et al. Integrated approaches to understanding and reducing drought impact on food security across scales. *Current Opinion in Environmental Sustainability.* 2019;40:43–54. <https://doi.org/10.1016/j.cosust.2019.09.006>
36. Kuria AW, Bolo P, Adoyo B, Korir H, Sakha M, Gumo P, et al. Understanding farmer options, context and preferences leads to the co-design of locally relevant agroecological practices for soil, water and integrated pest management: a case from Kiambu and Makueni agroecology living landscapes, Kenya. *Front Sustain Food Syst.* 2024;8. <https://doi.org/10.3389/fsufs.2024.1456620>
37. Rodenburg J, Büchi L, Haggag J. Adoption by adaptation: moving from Conservation Agriculture to conservation practices. *International Journal of Agricultural Sustainability.* 2020;19(5–6):437–55. <https://doi.org/10.1080/14735903.2020.1785734>

38. Jacobi J, Mukhovi S, Llanque A, Toledo D, Ifejika Speranza C, Käser F, et al. Actor-specific risk perceptions and strategies for resilience building in different food systems in Kenya and Bolivia. *Reg Environ Change*. 2018;19(3):879–92. <https://doi.org/10.1007/s10113-018-1448-x>
39. van Berkum S, Dengerink D, Ruben R. The food systems approach: sustainable solutions for a sufficient supply of healthy food. Wageningen: Wageningen Economic Research. 2018. <https://edepot.wur.nl/451505>
40. Onyeaka H, Siyanbola KF, Akinsemolu AA, Tamasiga P, Mbaeyi-Nwaoha IE, Okonkwo CE, et al. Promoting equity and justice: harnessing the right to food for Africa's food security. *Agric & Food Secur*. 2024;13(1). <https://doi.org/10.1186/s40066-024-00505-0>
41. Bjornlund V, Bjornlund H, van Rooyen A. Why food insecurity persists in sub-Saharan Africa: A review of existing evidence. *Food Secur*. 2022;14(4):845–64. <https://doi.org/10.1007/s12571-022-01256-1> PMID: 35136455
42. Hannaford MJ. Deep histories of food systems in eastern Africa and current patterns of food insecurity. *Nat Food*. 2023;4(11):949–60. <https://doi.org/10.1038/s43016-023-00879-7> PMID: 37974027
43. Garutsa TC, Nekhwevha FH. Labour-burdened women utilising their marginalised indigenous knowledge in food production processes: The case of Khambashe rural households, Eastern Cape, South Africa. *South African Review of Sociology*. 2016;47(4):106–20. <https://doi.org/10.1080/21528586.2016.1204243>
44. Govil R, Rana G. Demand for Agricultural Information among Women Farmers: A Survey from Karnataka, India. *RAS*. 2017;7(1):133–48. <https://doi.org/10.25003/ras.07.01.0006>
45. Isaya EL, Agunga R, Sanga CA. Sources of agricultural information for women farmers in Tanzania. *Information Development*. 2016;34(1):77–89. <https://doi.org/10.1177/0266666916675016>
46. Acosta M, van Wessel M, van Bommel S, Ampaire EL, Twyman J, Jassogne L, et al. What does it Mean to Make a 'Joint' Decision? Unpacking Intra-household Decision Making in Agriculture: Implications for Policy and Practice. *The Journal of Development Studies*. 2019;56(6):1210–29. <https://doi.org/10.1080/00220388.2019.1650169>
47. Gebre GG, Isoda H, Rahut DB, Amekawa Y, Nomura H. Gender Gaps in Market Participation Among Individual and Joint Decision-Making Farm Households: Evidence from Southern Ethiopia. *Eur J Dev Res*. 2020;33(3):649–83. <https://doi.org/10.1057/s41287-020-00289-6>
48. Tran DB, Tran HTM, Pham TDN, Nguyen TT. Education and agricultural household income: Comparative evidence from Vietnam and Thailand. *World Development Perspectives*. 2023;29:100489. <https://doi.org/10.1016/j.wdp.2023.100489>
49. Mairura FS, Musafiri CM, Kiboi MN, Macharia JM, Ng'etich OK, Shisanya CA, et al. Farm factors influencing soil fertility management patterns in Upper Eastern Kenya. *Environmental Challenges*. 2022;6:100409. <https://doi.org/10.1016/j.envc.2021.100409>
50. Meti T, Ndirangu S, Nyarindo W. Determinants of adoption of climate-smart agricultural practices: The case of smallholders in Makueni County, Kenya. *Advances in Agriculture*. 2025;2025(1):4159649.
51. Saiz G, Wandera FM, Pelster DE, Ngetich W, Okalebo JR, Rufino MC, et al. Long-term assessment of soil and water conservation measures (Fanya-juu terraces) on soil organic matter in South Eastern Kenya. *Geoderma*. 2016;274:1–9.
52. Downing TA, Olago DO. History of 'nature-based' solutions to land degradation in the savannahs of Kenya: An analysis of literature and archival records. *Environmental Science & Policy*. 2024;161:103874. <https://doi.org/10.1016/j.envsci.2024.103874>
53. Eyasu AM, Zewotir T, Dessie ZG. Association of crop commercialization and rural households' multidimensional poverty using targeted maximum likelihood estimation. *Scientific African*. 2024;26:e02422. <https://doi.org/10.1016/j.sciaf.2024.e02422>
54. Mutea E, Jacobi J, Rist S, Kiteme B, Hossain MS. Agricultural commercialization and food security: Evidence and policy implications for small-holder farmers in Kenya. *World Development Sustainability*. 2025;6:100214. <https://doi.org/10.1016/j.wds.2025.100214>
55. Yilmaz H, Njora B. Analysis of the impact of agricultural policies on food security in Kenya. *Eurasian Journal of Agricultural Research*. 2021;5(2):66–83.
56. Kanda EK, Lutta VO. The status and challenges of a modern irrigation system in Kenya: A systematic review. *Irrigation and Drainage*. 2022;71(S1):27–38. <https://doi.org/10.1002/ird.2700>
57. Haushofer J, Chemin M, Jang C, Abraham J. Economic and psychological effects of health insurance and cash transfers: Evidence from a randomized experiment in Kenya. *Journal of Development Economics*. 2020;144:102416. <https://doi.org/10.1016/j.jdevco.2019.102416>
58. Omondi S, Nyongesa D, Odhiambo S. Impact of Cash Transfers on Poverty Reduction towards Achieving Sustainable Development Goals among Female-Headed Households in Siaya County, Kenya. *IJRIS*. 2023;VII(IX):1052–60. <https://doi.org/10.47772/ijriss.2023.70991>
59. Owusu-Addo E, Renzaho AMN, Sarfo-Mensah P, Sarpong YA, Niyuni W, Smith BJ. Sustainability of cash transfer programs: A realist case study. *Poverty & Public Policy*. 2023;15(2):173–98. <https://doi.org/10.1002/pop4.367>
60. Matata MJ, Ngigi MW, Bett HK. Effects of cash transfers on household resilience to climate shocks in the arid and semi arid counties of northern Kenya. *Development Studies Research*. 2023;10(1). <https://doi.org/10.1080/21665095.2022.2164031>
61. Rancourt M-È, Cordeau J-F, Laporte G, Watkins B. Tactical network planning for food aid distribution in Kenya. *Computers & Operations Research*. 2015;56:68–83. <https://doi.org/10.1016/j.cor.2014.10.018>
62. Stacey P, Funder M, Hassan R, Nathan I, Rotich S, Wachira J. Climate change adaptation as social navigation: Insights from Kenya's drylands. *Geoforum*. 2025;165:104366. <https://doi.org/10.1016/j.geoforum.2025.104366>
63. Kimani-Murage EW, Osogo D, Nyamasege CK, Igonya EK, Ngira DO, Harrington J. COVID- 19 and human right to food: lived experiences of the urban poor in Kenya with the impacts of government's response measures, a participatory qualitative study. *BMC Public Health*. 2022;22(1):1399. <https://doi.org/10.1186/s12889-022-13638-3> PMID: 35864480

64. d'Errico M, Jumbe E, Oliver L, Pietrelli R, Staffieri I, Winters P. Transfers as a Means to Mitigate COVID-19 Impacts on Food Security: Evidence from Refugee and Host Communities Uganda. *The Journal of Development Studies*. 2024;60(3):432–56. <https://doi.org/10.1080/00220388.2023.2282368>
65. Mutonyi S. The effect of collective action on smallholder income and asset holdings in Kenya. *World Development Perspectives*. 2019;14:100099. <https://doi.org/10.1016/j.wdp.2019.02.010>
66. Jacobi J, Mukhovi S, Llanque A, Giger M, Bessa A, Golay C, et al. A new understanding and evaluation of food sustainability in six different food systems in Kenya and Bolivia. *Scientific Reports*. 2020;10(1):19145. <https://doi.org/10.1038/s41598-020-75966-5>
67. Matarrita-Cascante D, Lee JH, Nam JW. What elements should be present in any community development initiative? Distinguishing community development from local development. *Local Development & Society*. 2020;1(2):95–115. <https://doi.org/10.1080/26883597.2020.1829986>
68. Ananga EO, Naiga R. Community Participation in Development Planning: A Socio-Historical Analysis of Its Strengths and Weaknesses. *Asia-Pacific Journal of Rural Development*. 2023;33(2):195–209. <https://doi.org/10.1177/10185291241273720>
69. Kanyamuna V, Zulu K. Participatory research methods: Importance and limitations of participation in development practice. *World Journal of Social Sciences and Humanities*. 2022;8(1):9–13.
